# Supplementary material for: Inhibitory Antibodies against Activin A and TGF-β Reduce Self-Supported, but Not Soluble Factors-Induced Growth of Human Pulmonary Arterial Vascular Smooth Muscle Cells in Pulmonary Arterial Hypertension
Source: MDPI journal article supplement (doi:10.3390/ijms19102957), 2018-09-28
Supplement: s1 [file s1]

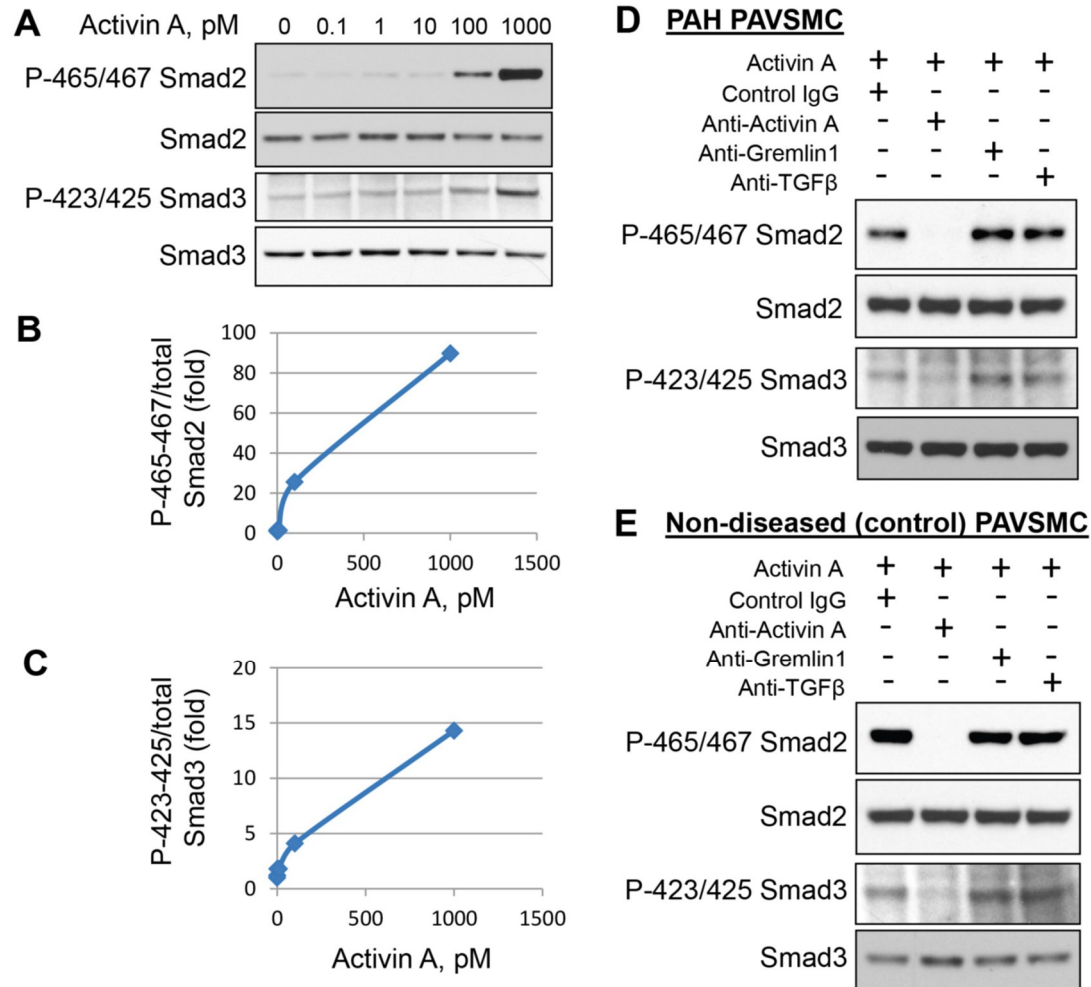

**Figure S1.** Establishing working concentration for inhibitory anti-Activin A antibody for human PAVSMC. A-C: Analysis of Smad2 and Smad3 phosphorylation in PAH PAVSMC induced by Activin A. (A) Human PAH PAVSMC were serum deprived for 48h in cultural media supplemented with 0.1% BSA, treated with indicated concentrations of Activin A for 18 h and then subjected to immunoblot analysis to detect indicated proteins. The EC<sub>50</sub> value of Activin A on Smad2 phosphorylation at S465/467 (B) and on Smad3 phosphorylation at S423/425 (C) was calculated as ~350pM. Based on this, concentration of therapeutic antibodies in further experiments had been fixed at 3500 pM (3.5 nM). D-E: Inhibitory antibodies to Activin A selectively reduce Activin A-dependent Smad2 and Smad3 phosphorylation in PAH (D) and non-diseased (Control) human PAVSMC (E). PAVSMC were serum-deprived for 48 h, treated with 3.5 nM antibodies to Activin A, Gremlin 1 and TGF- $\beta$  or control IgG in the presence of 350 pM recombinant Activin A. After 18 h of incubation, immunoblot analysis with indicated antibodies was performed.
